# Supplementary material
Source: publisher figshare collection journal article supplement (https://rs.figshare.com/ndownloader/files/12940112)
Supplement: Supplementary file 1 [file 12940112]

## Sheet: EstimatedRotationalVelocities
Electronic Supplementary Materials for:
Come on baby, let’s do the twist: the kinematics of killing in loggerhead shrikes
Diego Sustaita, Margaret A. Rubega, and Susan M. Farabaugh
Data S3. Angular velocities estimated from four sequences of four individual shrikes, from the time required to complete an ~90° turn of the head (i.e., half-oscillation) while processing mice.
ShrikeID/Sex/Age/Mouse	VideoDate	FrameRangeOfHeadRoll	DurationOf HeadRoll (s)	90-Deg/Duration	Rad/s
2387M/ADU	2012-06-10	8	0.004	2812.5	49.0874
1310M/ADU	2011-02-21	4	0.032	2812.5	49.0874
1569F/ADU	2011-02-26	3	0.024	3750	65.4498
929M/ADU	2011-02-22	3	0.024	3750	65.4498
